# Supplementary material
Source: MDPI journal article supplement (https://www.mdpi.com/2673-687X/3/2/13)
Supplement: s1 [file s1]

Article

# Electronic, Structural, Optical, and Electrical Properties of CsPbX<sub>3</sub> Powders (X = Cl, Br, and I) Prepared Using a Surfactant-Free Hydrothermal Approach

Carlos Echeverría-Arondo <sup>1</sup>, Agustin O. Alvarez <sup>1</sup>, Sofia Masi <sup>1</sup>, Francisco Fabregat-Santiago <sup>1</sup> and Felipe A. La Porta <sup>1,2,3,\*</sup>

**Citation:** Echeverría-Arondo, C.; Alvarez, A.O.; Masi, S.; Fabregat-Santiago, F.; La Porta, F.A. Electronic, Structural, Optical, and Electrical Properties of CsPbX<sub>3</sub> Powders (X = Cl, Br, and I) Prepared Using a Surfactant-Free Hydrothermal Approach. *Nanomanufacturing* **2023**, *3*, x. <https://doi.org/10.3390/nanomanufacturing3020013>

<sup>1</sup> Institute of Advanced Materials (INAM), Universitat Jaume I, Av. Sos Baynat, s/n, 12006 Castellón, Spain  
<sup>2</sup> Nanotechnology and Computational Chemistry Laboratory (NANOQC), Federal Technological University of Paraná, Avenida dos Pioneiros 3131, Londrina 86036-370, PR, Brazil  
<sup>3</sup> Post-Graduation Program in Chemistry, State University of Londrina, Londrina 86057-970, PR, Brazil  
\* Correspondence: felipelaporta@utfpr.edu.br

Academic Editor: Riccardo Frisenda

Received: 19 January 2023

Revised: 3 May 2023

Accepted: 5 May 2023

Published: 19 May 2023

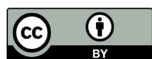

**Copyright:** © 2023 by the authors. Submitted for possible open access publication under the terms and conditions of the Creative Commons Attribution (CC BY) license (<https://creativecommons.org/licenses/by/4.0/>).

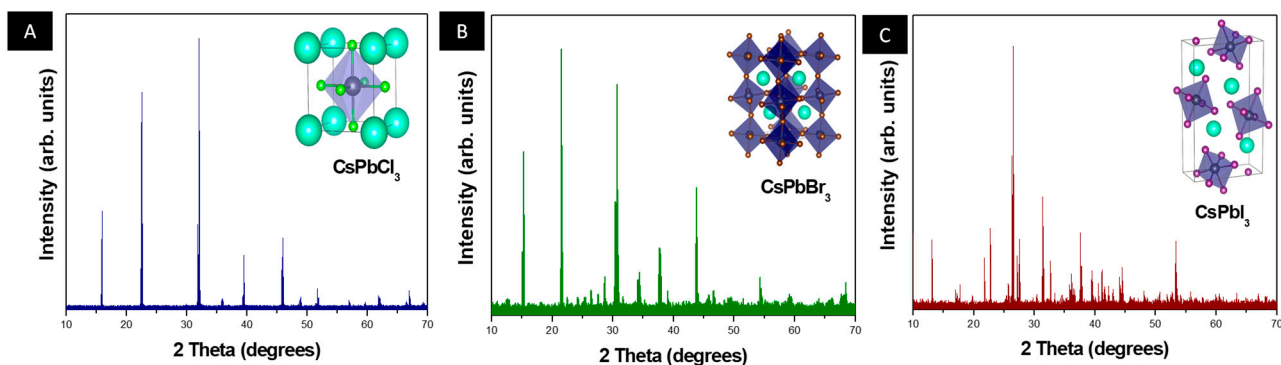

**Figure S1.** XRD patterns of CsPbX<sub>3</sub> samples prepared by hydrothermal method: (A) CsPbCl<sub>3</sub>, (B) CsPbBr<sub>3</sub> and (C) CsPbI<sub>3</sub>.
